# Supplementary material for: CCL28 modulates neutrophil responses during infection with mucosal pathogens
Source: eLife journal article supplement (doi:10.7554/elife.78206), 2024-08-28

**A** Neutrophils (STm infection *in vitro*)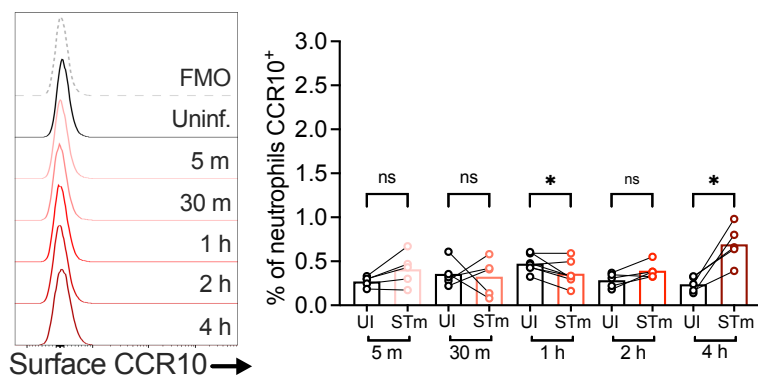**B** Neutrophils (STm infection *in vitro*)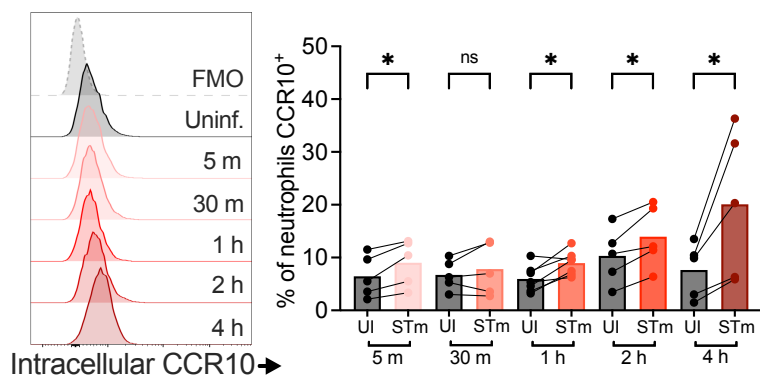**C** Neutrophils (Ab infection *in vitro*)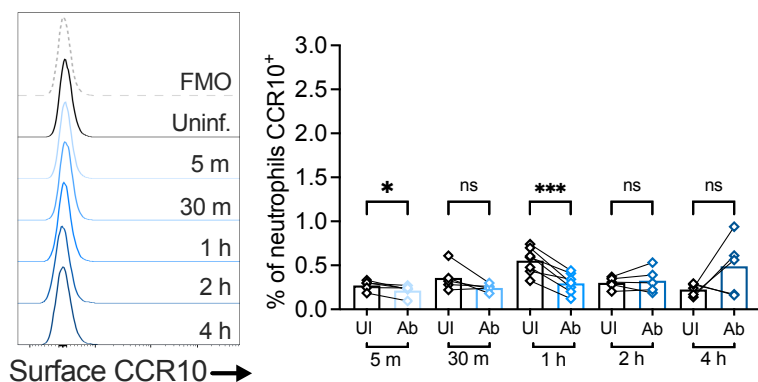**D** Neutrophils (Ab infection *in vitro*)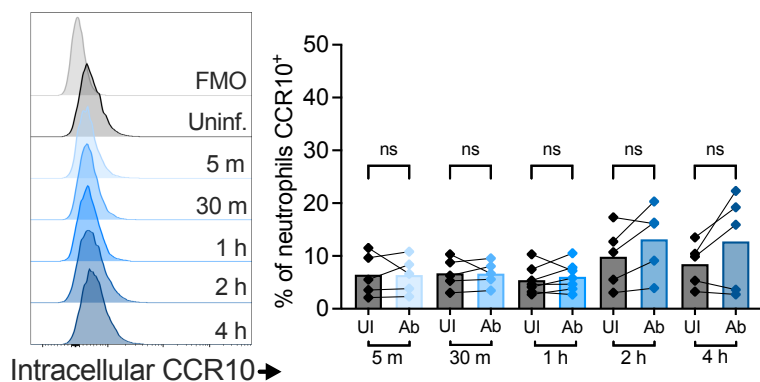**E** Neutrophils (STm infection *in vivo*)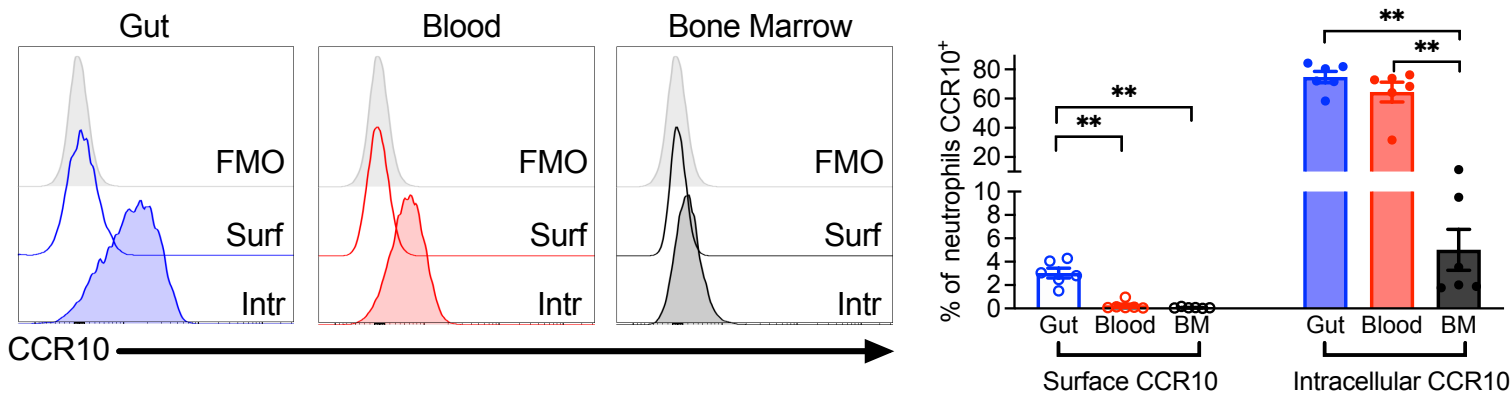**F** Neutrophils (*A. baumannii* infection *in vivo*)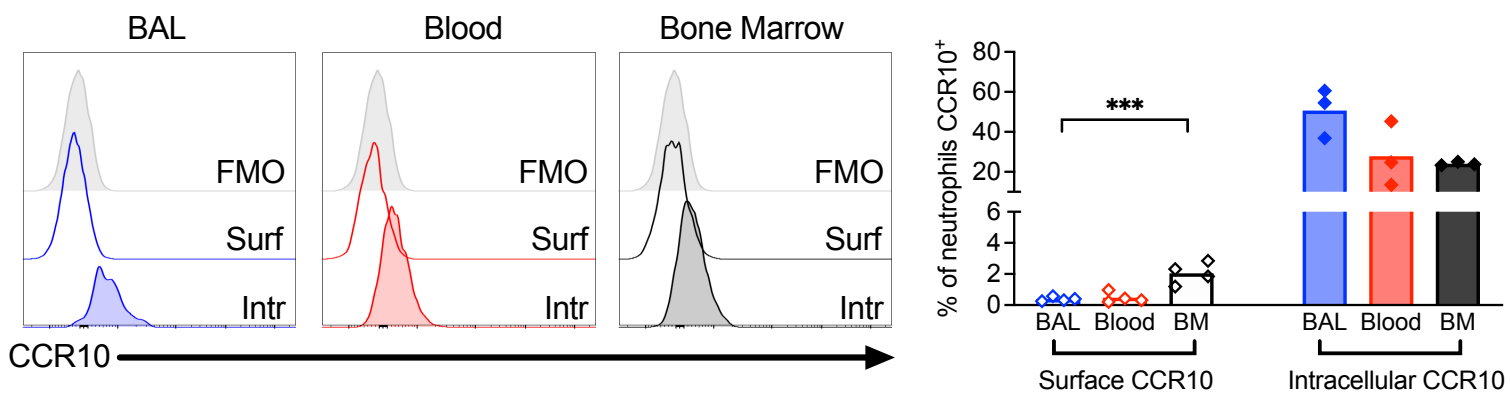

Supplement: supp [file elife_poa_e78206_Figure_4_figure_supplement_1.pdf › elife_poa_e78206_Figure_4_figure_supplement_1.pdf]
