# Supplementary figures and images for: CCL28 modulates neutrophil responses during infection with mucosal pathogens
Source: eLife journal article supplement (doi:10.7554/elife.78206), 2024-08-28

**A**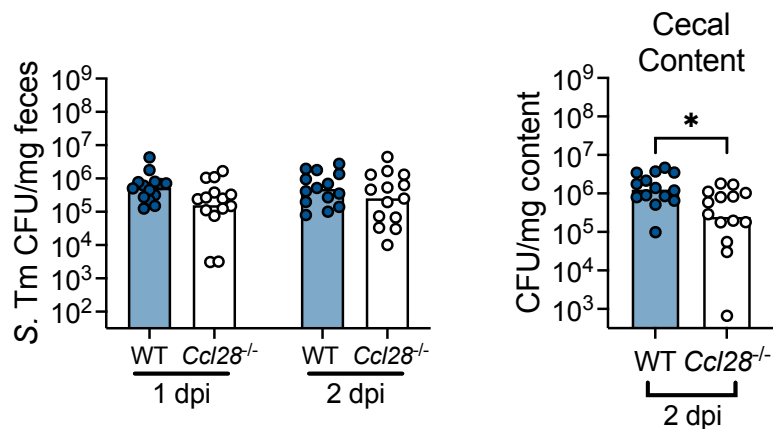**B**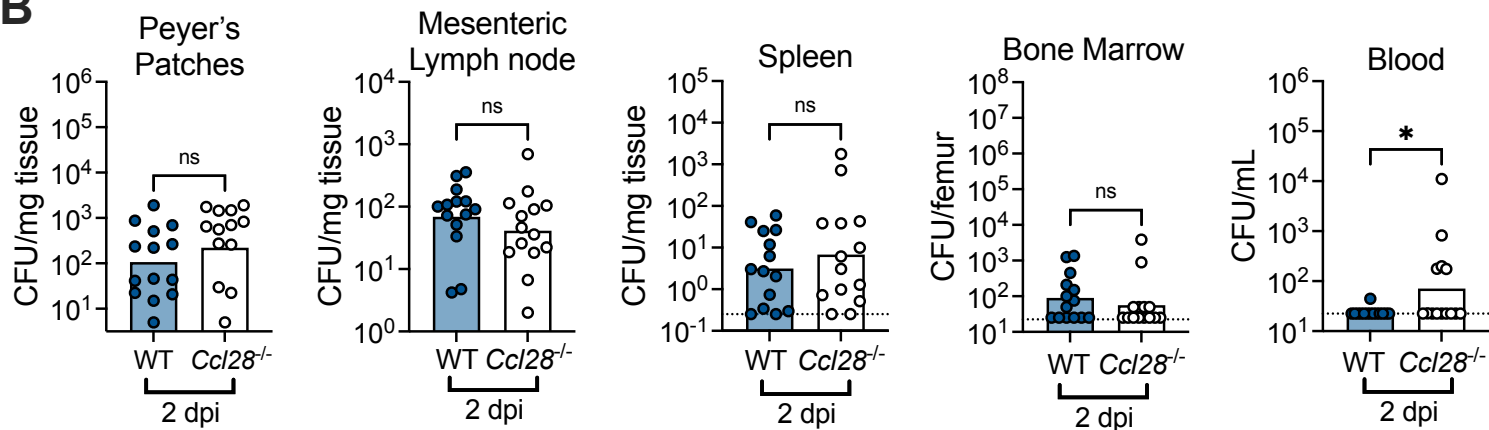

Supplement: supp [file elife_poa_e78206_Figure_1_figure_supplement_1.pdf › elife_poa_e78206_Figure_1_figure_supplement_1.pdf]

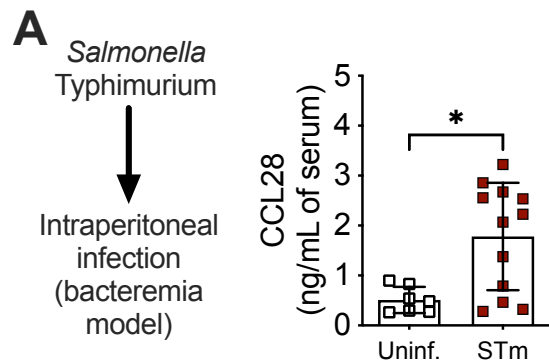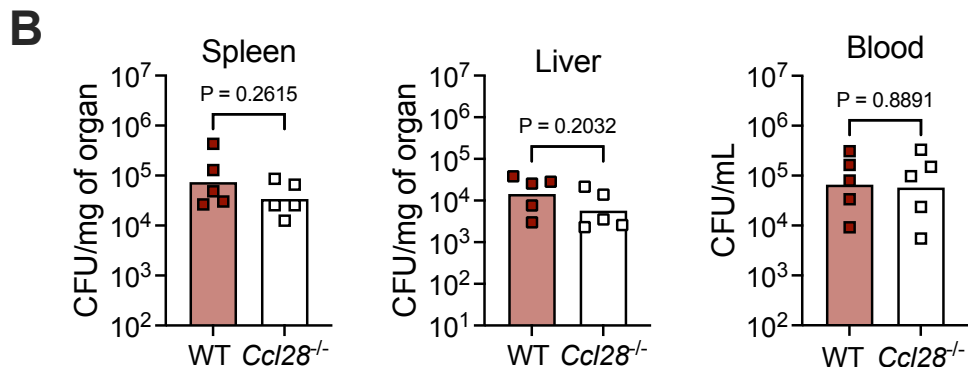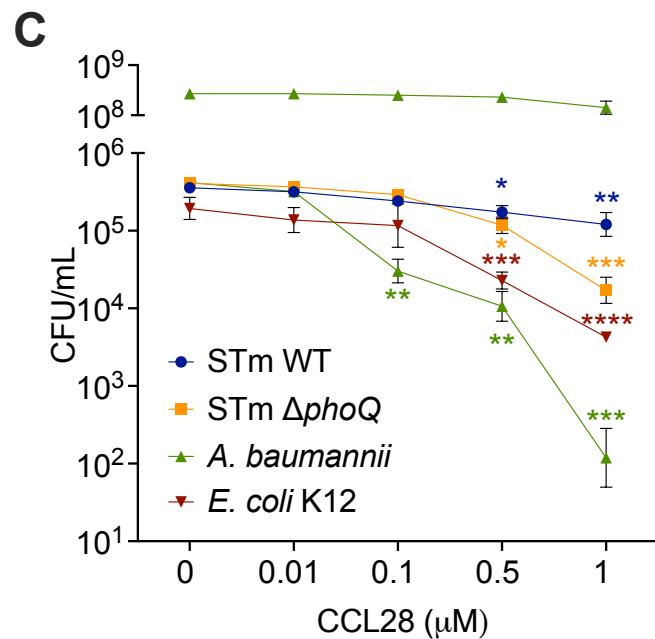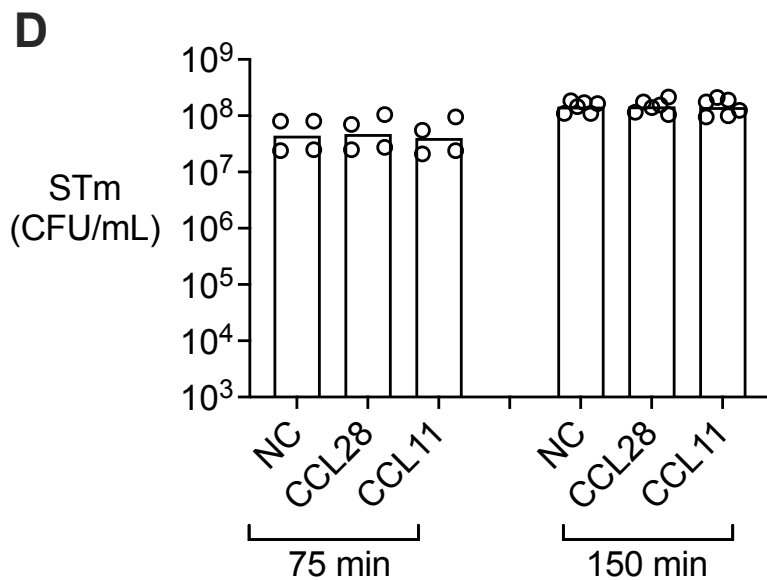

Supplement: supp [file elife_poa_e78206_Figure_1_figure_supplement_2.pdf › elife_poa_e78206_Figure_1_figure_supplement_2.pdf]

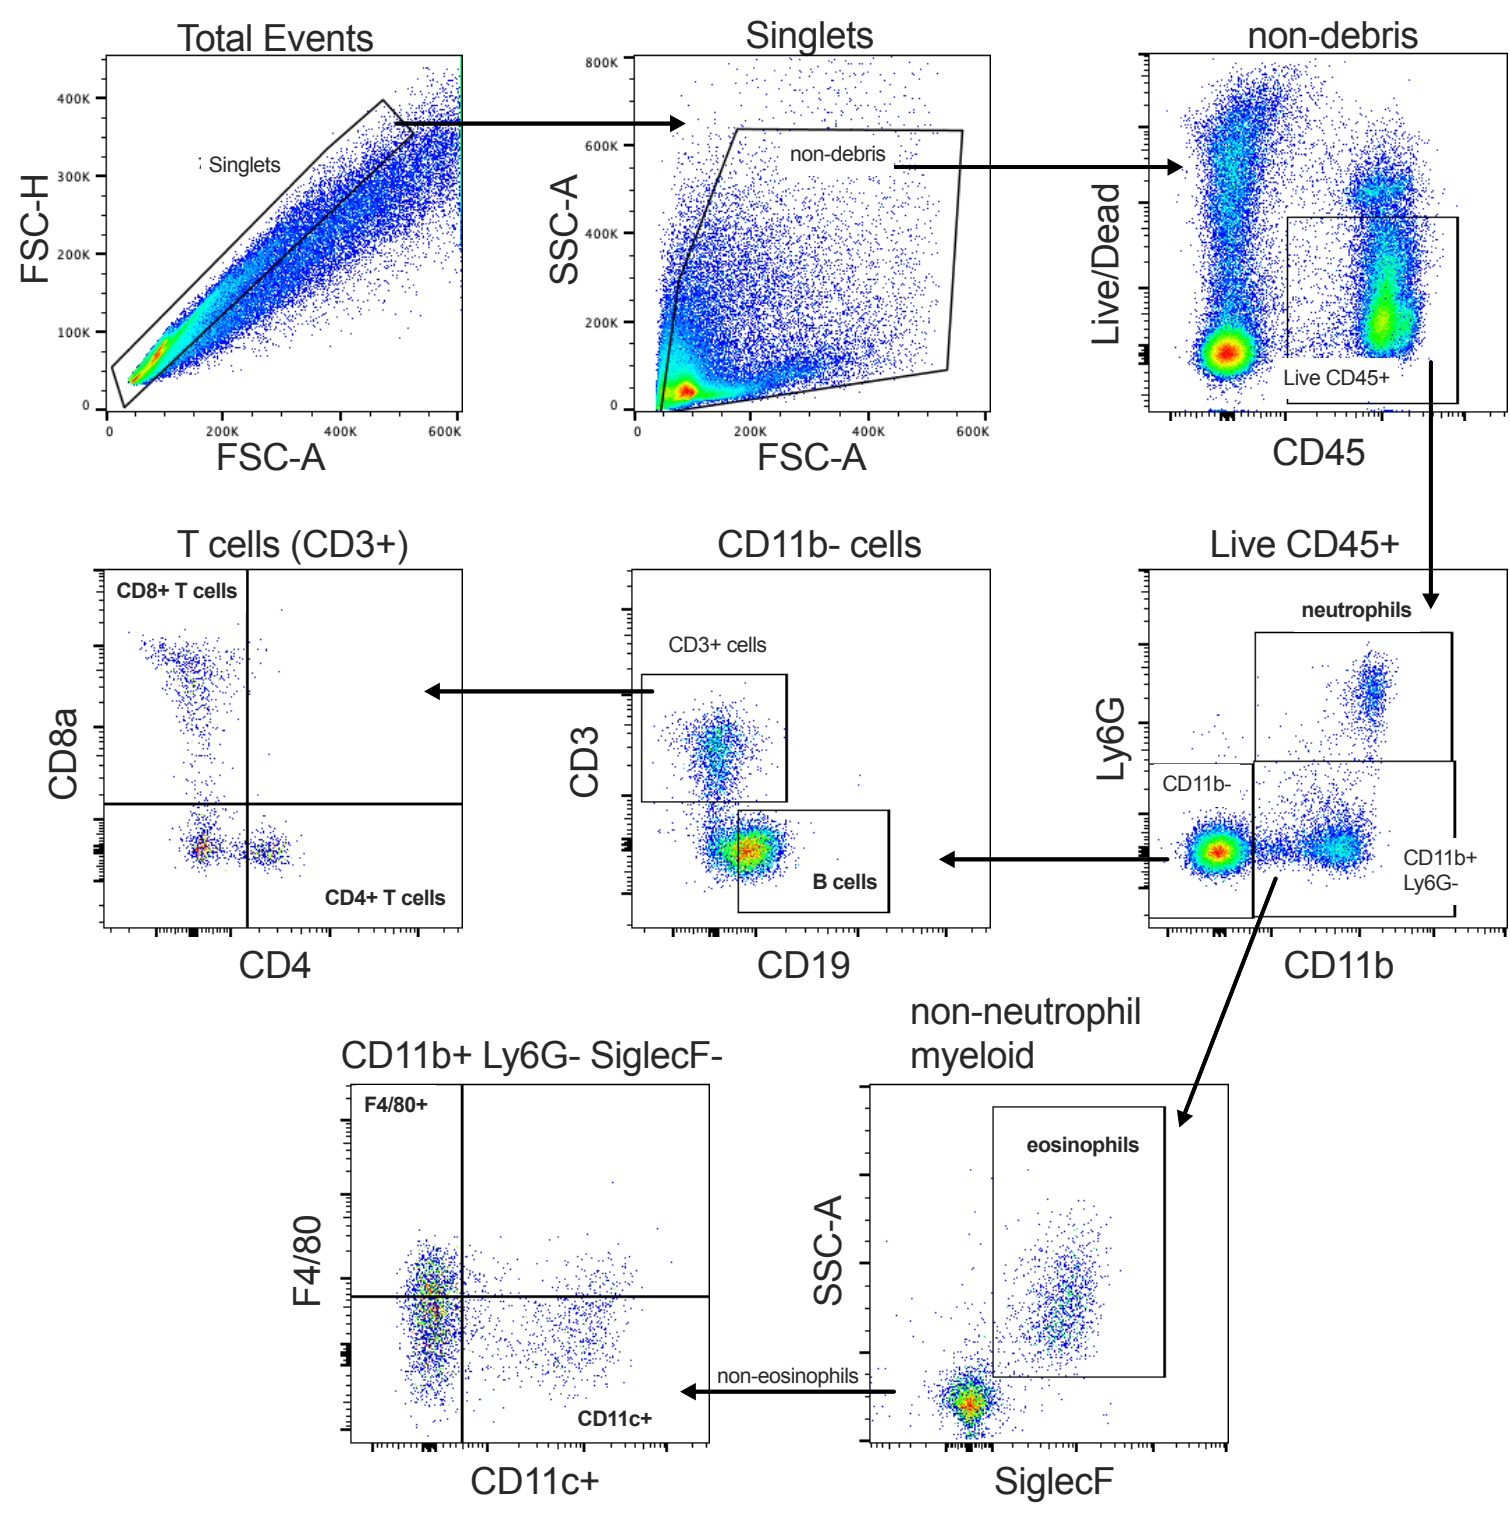

Supplement: supp [file elife_poa_e78206_Figure_1_figure_supplement_3.pdf › elife_poa_e78206_Figure_1_figure_supplement_3.pdf]

**A**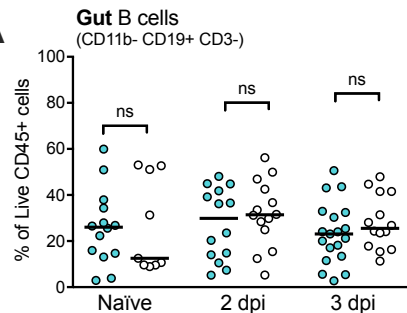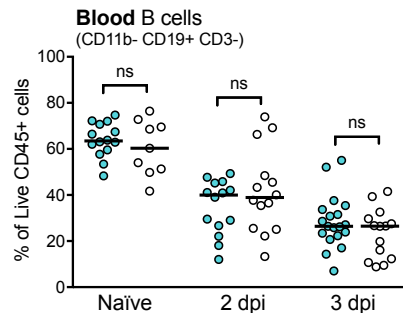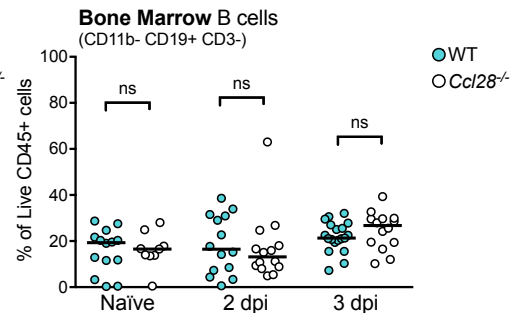**B**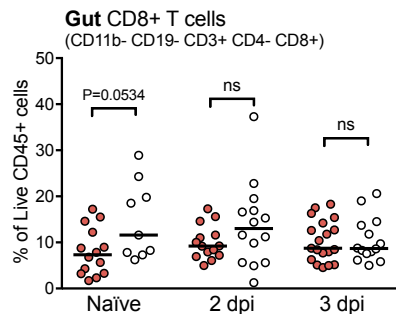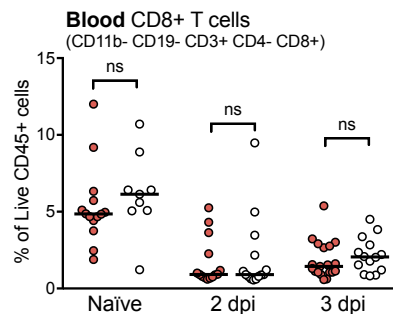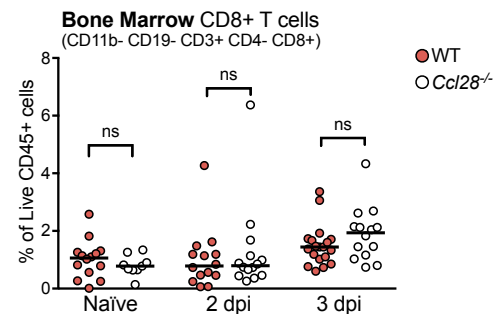**C**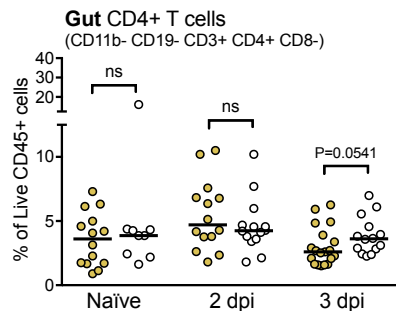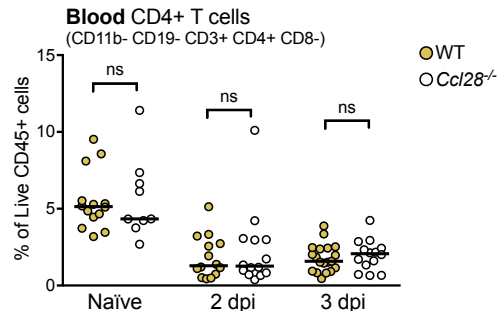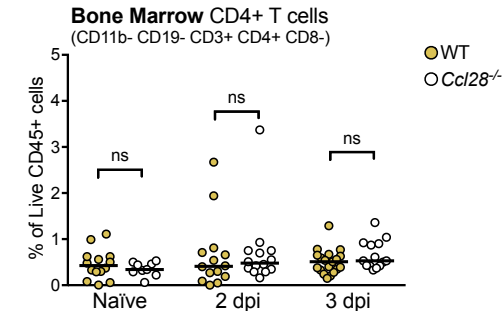

Supplement: supp [file elife_poa_e78206_Figure_1_figure_supplement_4.pdf › elife_poa_e78206_Figure_1_figure_supplement_4.pdf]

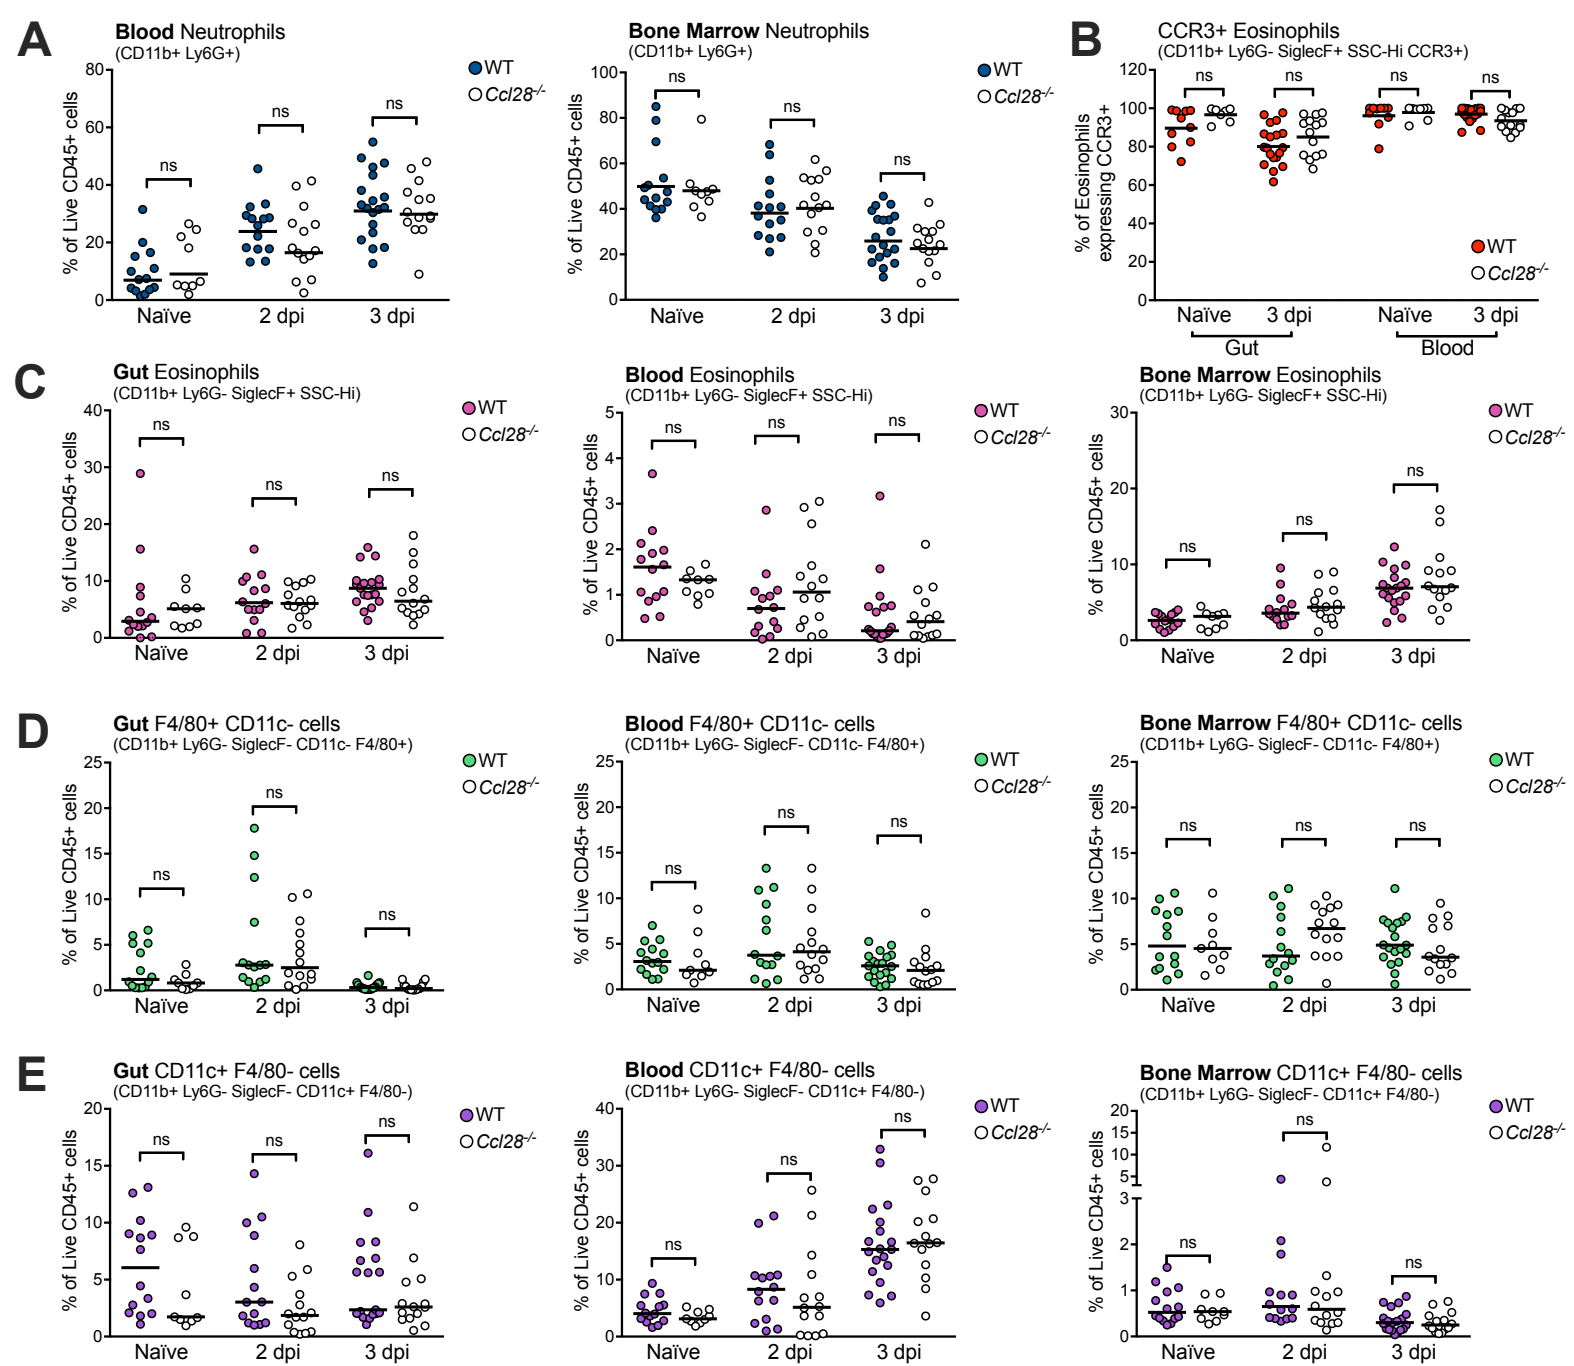

Supplement: supp [file elife_poa_e78206_Figure_1_figure_supplement_5.pdf › elife_poa_e78206_Figure_1_figure_supplement_5.pdf]

**A**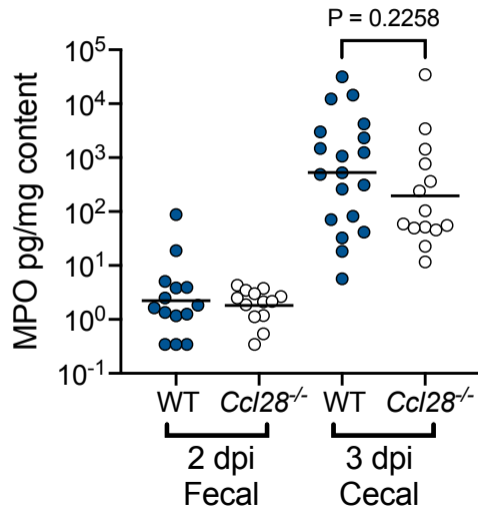**B**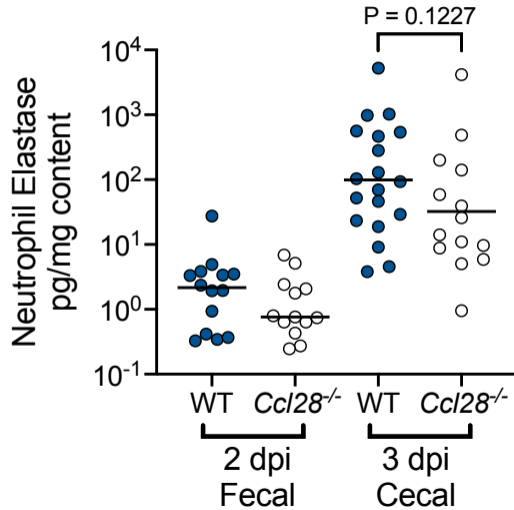**C**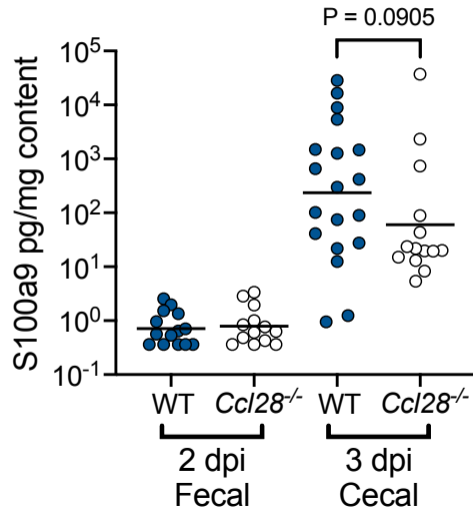

Supplement: supp [file elife_poa_e78206_Figure_1_figure_supplement_6.pdf › elife_poa_e78206_Figure_1_figure_supplement_6.pdf]

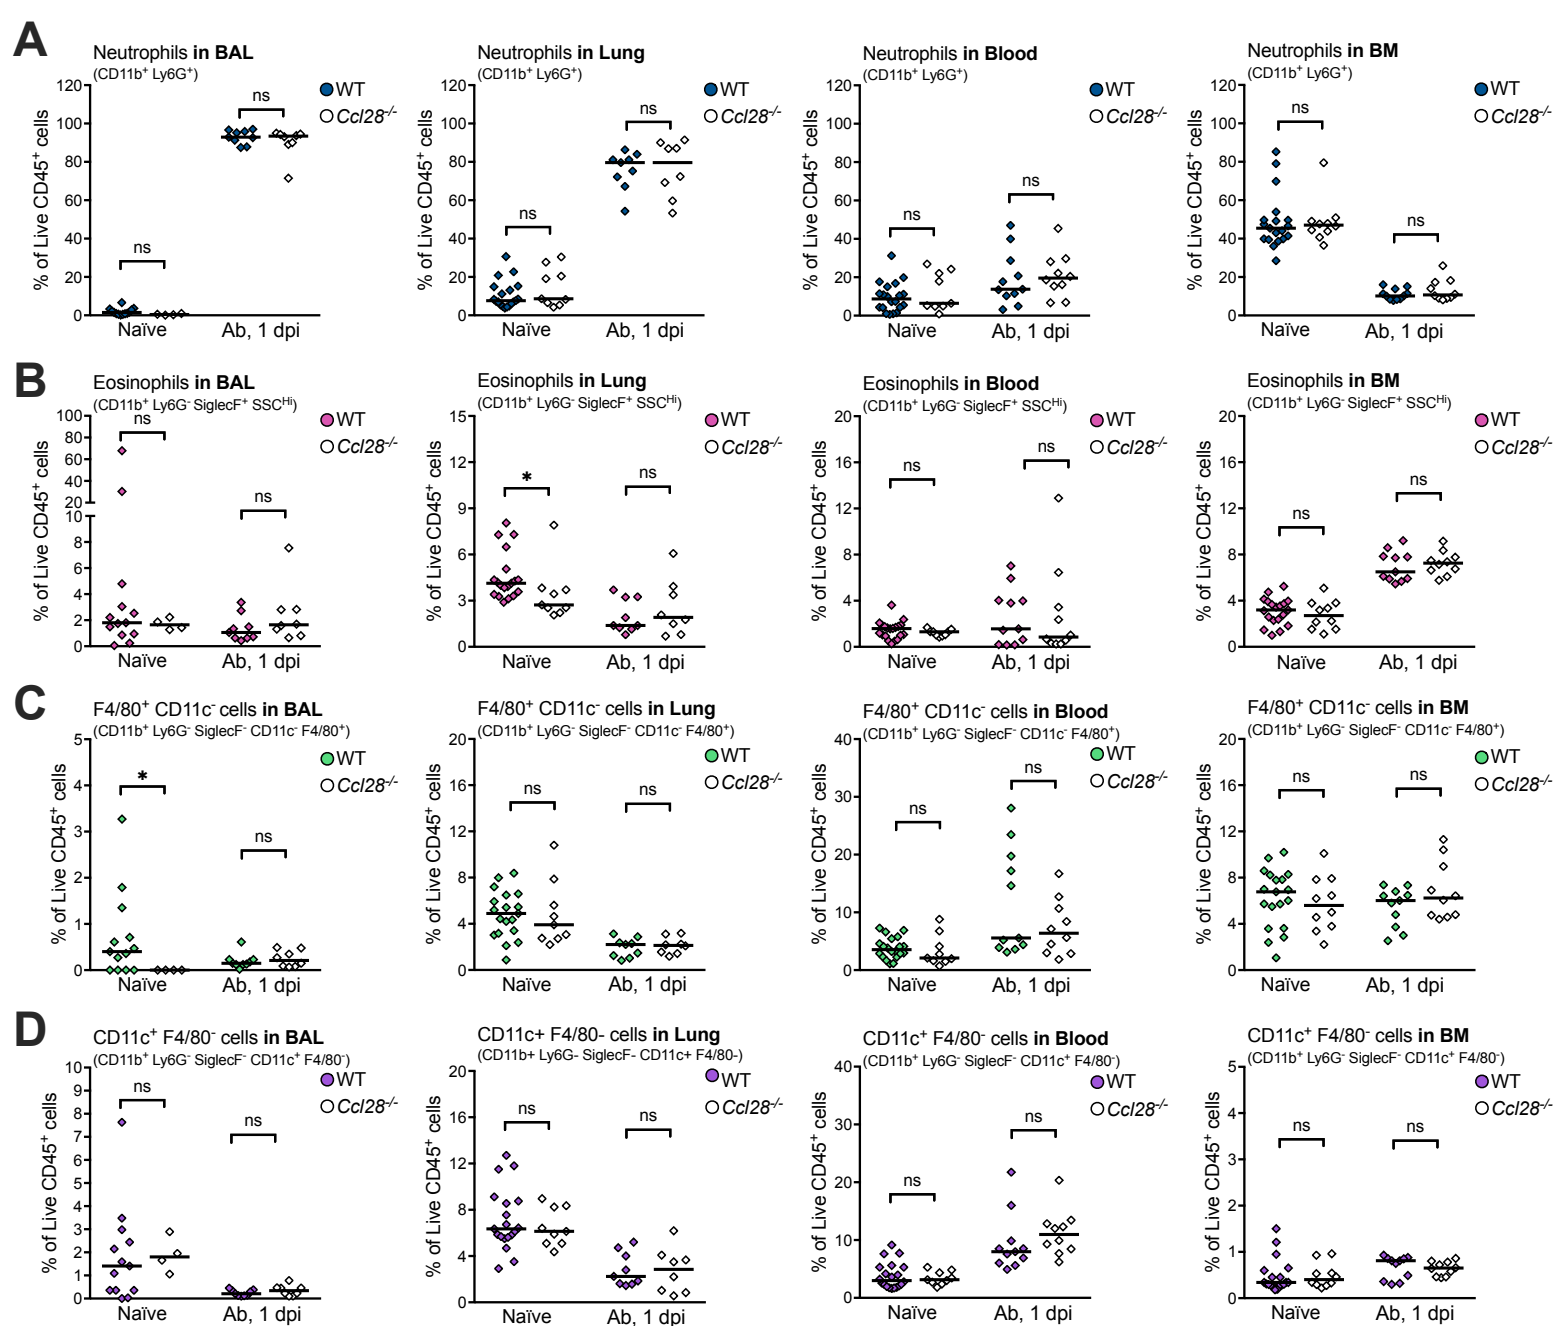

Supplement: supp [file elife_poa_e78206_Figure_2_figure_supplement_1.pdf › elife_poa_e78206_Figure_2_figure_supplement_1.pdf]

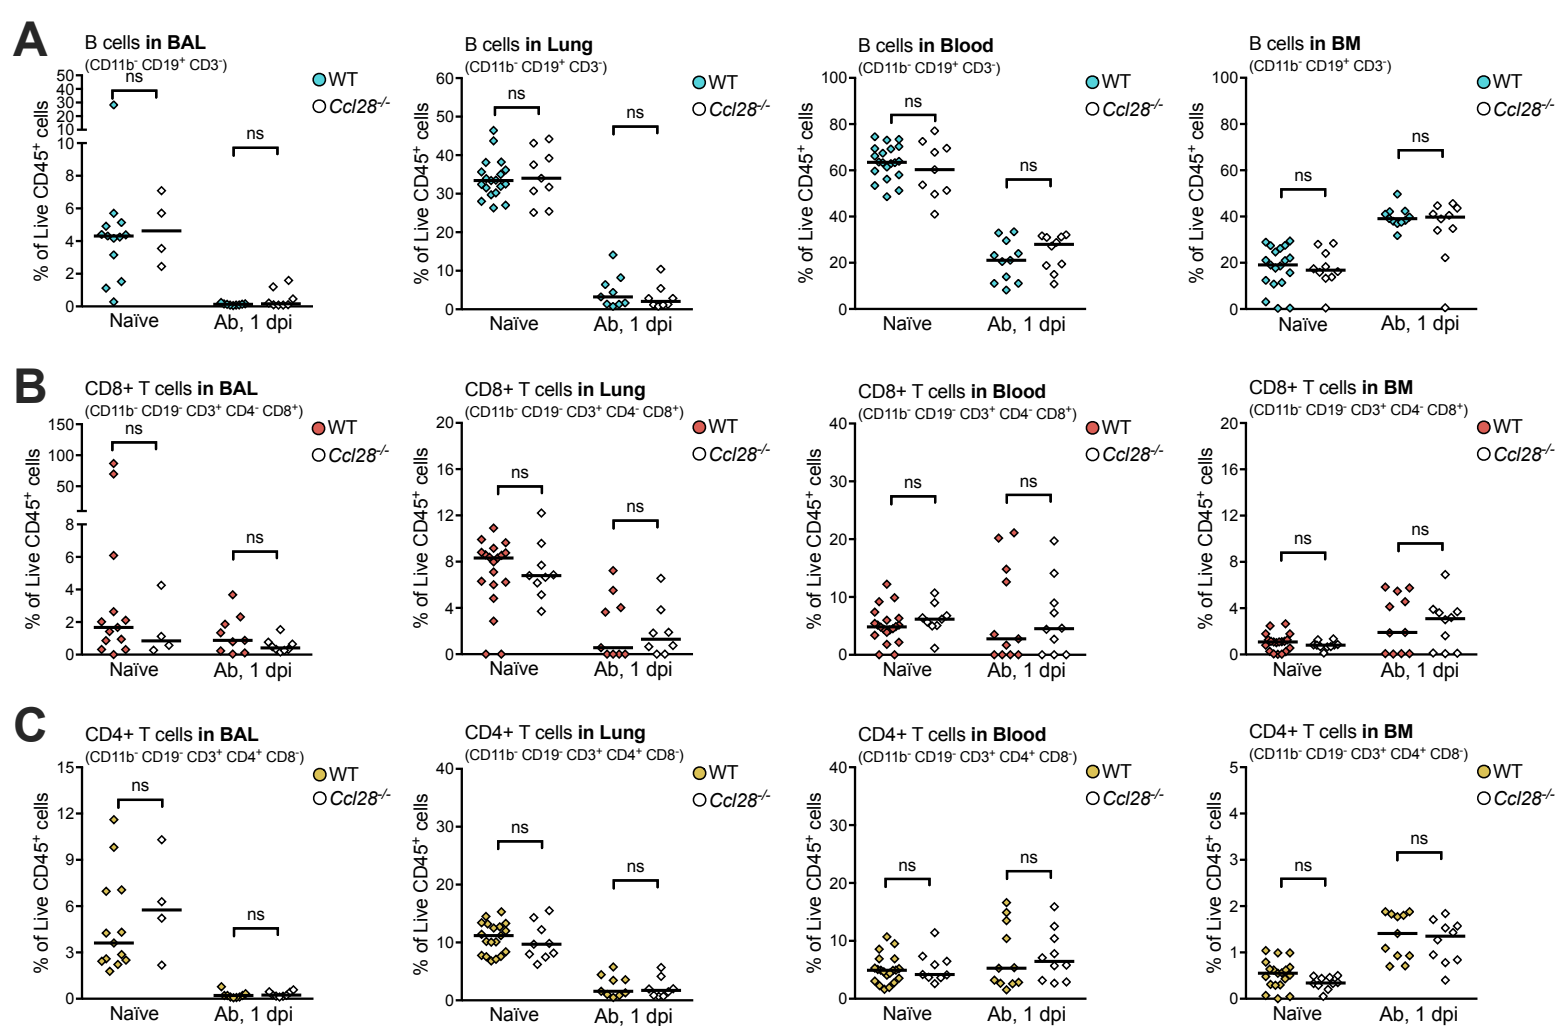

Supplement: supp [file elife_poa_e78206_Figure_2_figure_supplement_2.pdf › elife_poa_e78206_Figure_2_figure_supplement_2.pdf]

**A**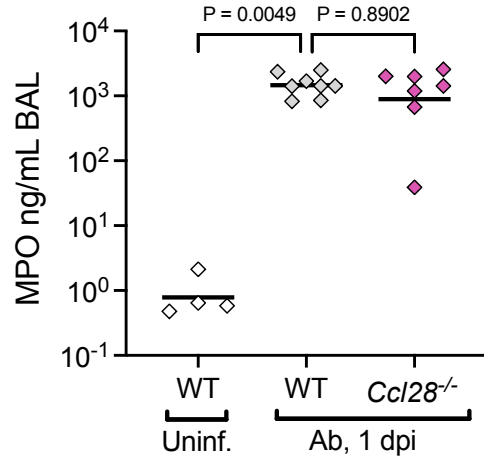**B**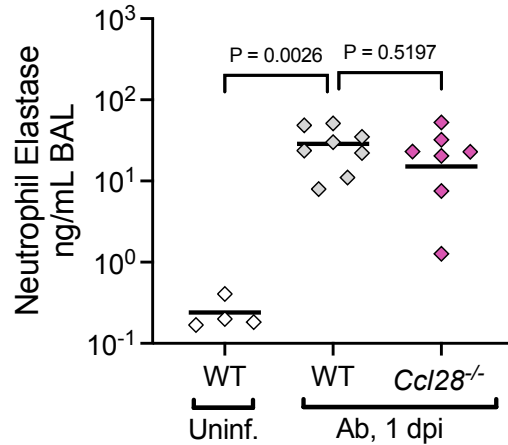**C**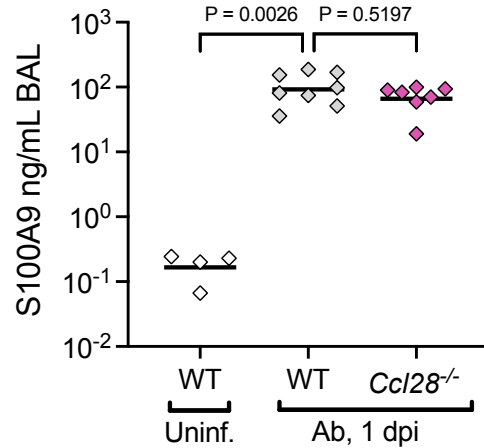

Supplement: supp [file elife_poa_e78206_Figure_2_figure_supplement_3.pdf › elife_poa_e78206_Figure_2_figure_supplement_3.pdf]

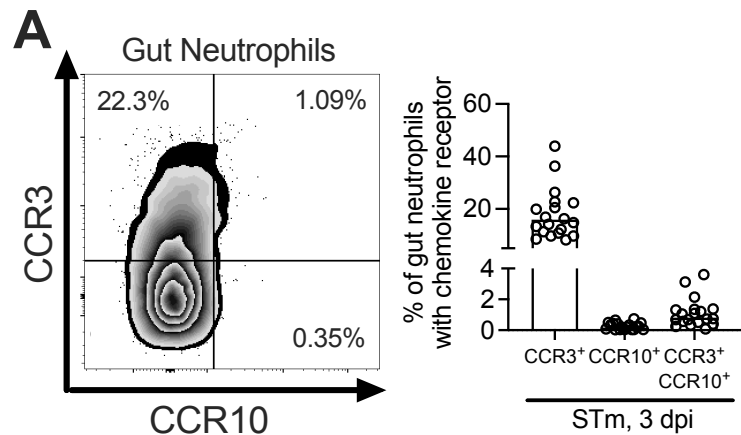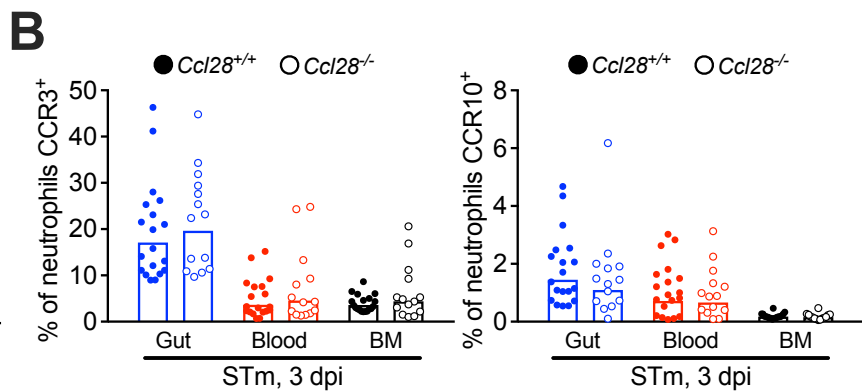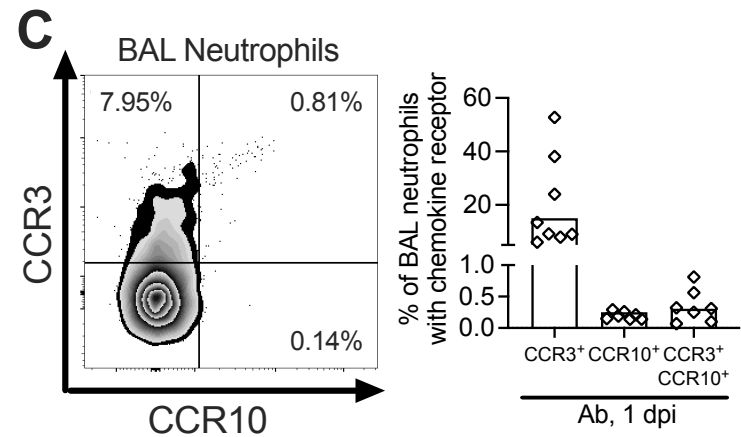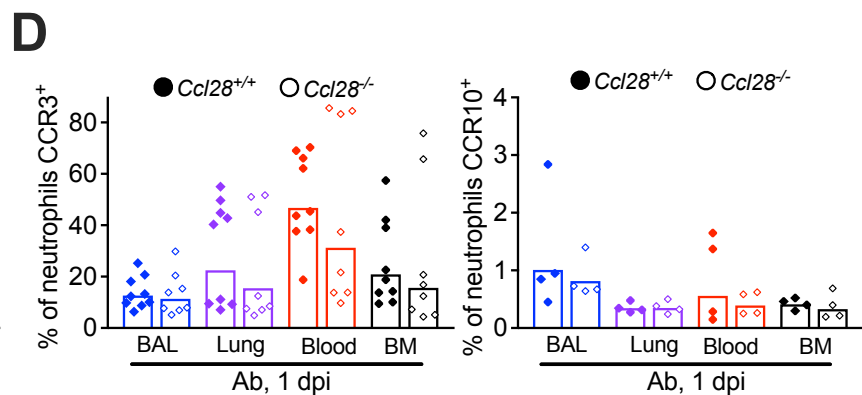

Supplement: supp [file elife_poa_e78206_Figure_3_figure_supplement_1.pdf › elife_poa_e78206_Figure_3_figure_supplement_1.pdf]

**A**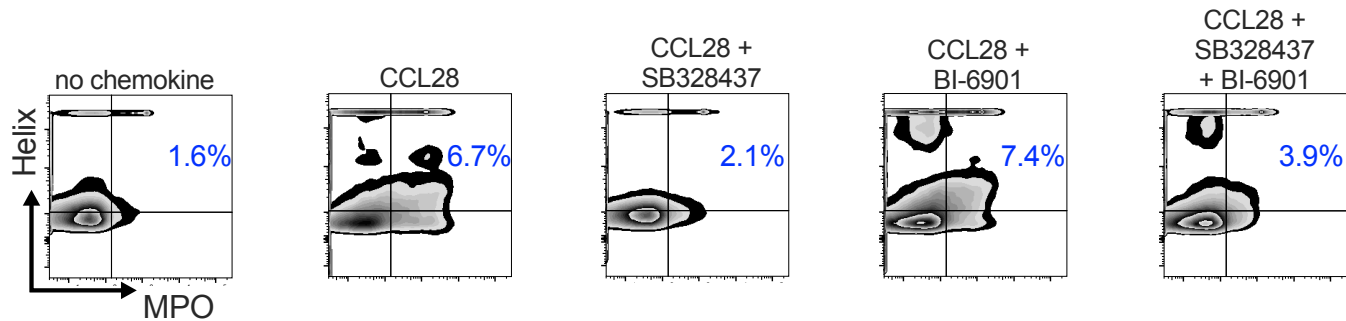**B**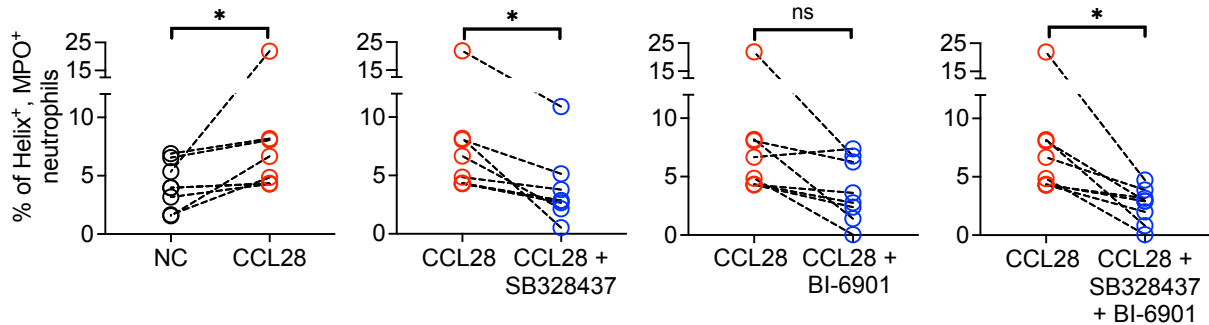

Supplement: supp [file elife_poa_e78206_Figure_5_figure_supplement_1.pdf › elife_poa_e78206_Figure_5_figure_supplement_1.pdf]
